# Supplementary material for: Stratification of rheumatoid arthritis cohort using Ayurveda based deep phenotyping approach identifies novel genes in a GWAS
Source: PubMed Central journal article supplement — J Ayurveda Integr Med. 2022 Jul 3;13(3):100578. doi: 10.1016/j.jaim.2022.100578 (PMC9259475; doi:10.1016/j.jaim.2022.100578), 2022-07-03
Supplement: mmc1.pdf [file mmc1.pdf]

|                                                                                                                                                            | Number of patients | Number of markers |
|------------------------------------------------------------------------------------------------------------------------------------------------------------|--------------------|-------------------|
|                                                                                                                                                            | 537                | 655 216           |
| Step 0. Remove poorly mapped markers and those w/o agreement between v1.0 and v1.1 and Will Rayner and Illumina                                            | 537                | 573 502           |
| Step 1. Removal of individuals/SNPs with low call rate<br>↓<br>Keep individuals with call rate $\geq 90\%$ and SNPs $\geq 90\%$                            | 478                | 549 466           |
| Step 2. Removal of individuals with discordant sex information<br>↓<br>Keep individuals with chromosome X homozygosity rate $\leq 20\%$                    | 475                | 549 466           |
| Step 3. Removal of individuals with excessive heterozygosity rate<br>↓<br>Keep individuals with heterozygosity rate $\leq 4 \times \text{S.D.}$            | 472                | 549 466           |
| Step 4. Removal of related individuals<br>↓<br>Keep individuals with identity-by-descent $\leq 0.25$                                                       | 444                | 549 466           |
| Step 5. Removal of population outliers<br>↓<br>Keep individuals within $4 \times \text{S.D.}$ from the population structure cluster center mean            | 444                | 549 466           |
| Step 6. Removal of rare and non-HWE markers<br>Keep SNPs with MAF $\geq 1\%$ and follow Hardy-Weinberg Equilibrium ( $p\text{-value} < 5 \times 10^{-6}$ ) | 444                | 528 461           |
